# Supplementary material
Source: HighWire-hosted journal article supplement (https://ez-admanager.com/highwire/filestream/135908/field_highwire_adjunct_files/0/raffeld_1823.pdf)
Supplement: raffeld_1823.pdf [file raffeld_1823.pdf]

# APOE ε4와 지질 수치의 재발성 비엽상 뇌내출혈에의 영향

## APOE ε4 and lipid levels affect risk of recurrent nonlobar intracerebral hemorrhage

Miriam R. Raffeld, BA\*  
 Alessandro Biffi, MD\*  
 Thomas W.K. Battey, BS  
 Alison M. Ayres, BA  
 Anand Viswanathan, MD,  
 PhD  
 Steven M. Greenberg, MD,  
 PhD  
 Jonathan Rosand, MD, MSc  
 Christopher D. Anderson,  
 MD, MMSc

**목적:** APOE 유전자 내에서 ε2/ε4 유전자 변형은 엽상 뇌내출혈(intracerebral hemorrhage, ICH)의 위험인자로 알려져 있다. 그러나 기존 예비연구에 의하면, APOE ε4는 비엽상 ICH와도 잠재적인 연관성이 있었다. 따라서 본 연구에서는, 재발성 비엽상 ICH에서 APOE의 역할을 조사하고, APOE가 혈액 속에서 순환하는 지질에 영향을 줌으로써 이러한 연관성을 매개하는지 여부를 연구하고자 하였다.

**방법:** 363명의 비엽상 ICH 이후 생존한 환자들을 대상으로 APOE 유전자형을 조사하고 ICH의 재발을 전향적으로 관찰하였다. 모든 환자에게서 치료 ICH 당시와 이후 추적 기간 동안 인구통계학 자료, 임상 자료, 검사 자료들을 수집했다. 다변량 분석 모델을 이용하여, APOE 유전자형, 지질 수치, 재발성 비엽상 ICH 사이의 유의성 및 상호 작용 분석을 시행하였다.

**결과:** 363명의 생존자 중 29명에게서 비엽상 ICH가 재발하였다. APOE ε4는 재발성 비엽상 ICH와 관련이 있었다(hazard ratio = 1.31; 95% confidence interval = 1.02–2.69;  $P = 0.038$ ). 나이/성별/인종 및 심혈관계 위험인자를 보정한 후, 저밀도지질단백의 증가( $P = 0.027$ )와 고밀도 지단백의 감소( $P = 0.046$ )는 재발성 비엽상 ICH의 감소와 관련이 있었다. 저밀도 지단백의 수치는 APOE ε4와 재발성 비엽상 ICH 사이의 연관성에 영향을 미쳤다(mediation  $P < 0.05$ ). APOE ε2와 재발성 비엽상 ICH 사이에는 관련성을 발견할 수 없었다.

**결론:** APOE ε4는 재발성 비엽상 ICH와 관련이 있으며, 이는 대뇌 아밀로이드혈관병증과 관련 없는 ICH와도 인과 관계가 있다는 추가적인 증거를 제공한다. 이러한 관계는 저밀도지질단백 수치에 의해 영향을 받으며, 이는 APOE ε4가 ICH의 발생에 미치는 영향이, 혈액 내 순환하는 지질 수치에 의해 일부 매개될 수 있음을 나타낸다.

Neurology® 2014;83:1823–1830

Figure 4 Nonlobar ICH recurrence risk by LDL levels and APOE genotype

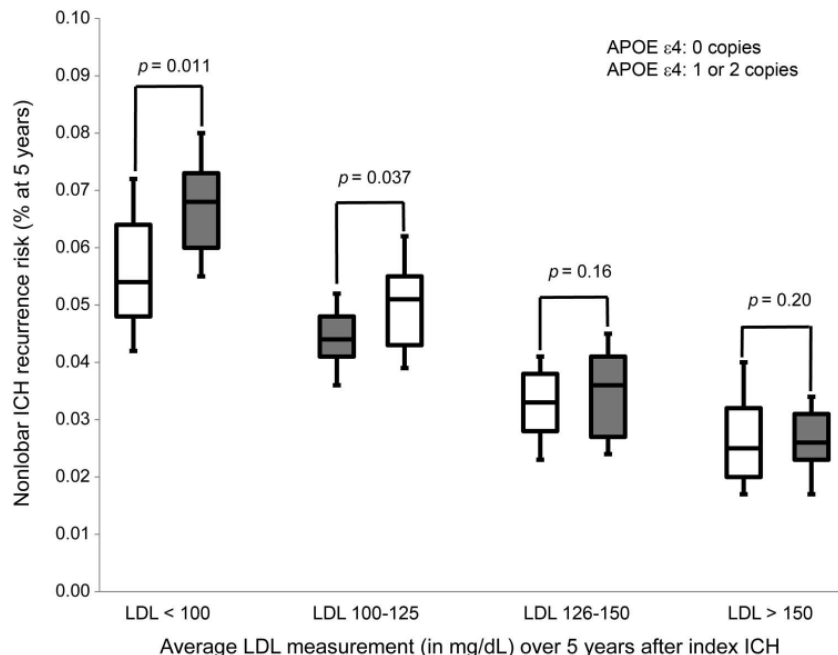

The  $p$  values are computed in each subset defined by LDL measurements using the log-rank test, and adjusting for race/ethnicity, education, CAD, and nonlobar ICH before index (enrollment event). LDL cutoffs represent mean values of all measurements during 5 years of follow-up, and were chosen to approximate LDL quartiles as identified in the overall dataset. CAD = coronary artery disease; ICH = intracerebral hemorrhage; LDL = low-density lipoprotein.
